# Supplementary material for: Hippocampal protection in mice with an attenuated inflammatory monocyte response to acute CNS picornavirus infection
Source: PubMed Central journal article supplement — Sci Rep. 2012 Jul 30;2:545. doi: 10.1038/srep00545 (PMC3408132; doi:10.1038/srep00545), 2012-07-30

**Hippocampal protection in mice with an attenuated inflammatory monocyte response to  
acute CNS picornavirus infection**

Charles L Howe<sup>1,2,3,\*</sup>, Reghann G. LaFrance-Corey<sup>1</sup>, Rhianna S Sundsbak<sup>1</sup>, Brian M Sauer<sup>1,4</sup>,  
Stephanie J LaFrance<sup>1</sup>, Eric J Buenz<sup>1,\$</sup>, William F Schmalstieg<sup>1</sup>

**Supplementary Figure 1. Bone marrow reconstitution converts the B10.S host to an SJL**

**immune system and vice versa.** Bone marrow transplantation was used to create chimeric

mice with a B10.S nervous system and an SJL immune system or an SJL nervous system with

a B10.S immune system. SJL immune phenotype is distinguished by CD45.2 staining and

B10.S by CD45.1 staining in the peripheral blood mononuclear cell fraction. Unstained controls

are shown in (A) and (B). Normal SJL (C) and B10.S (D) are shown as positive controls.

Reconstitution of SJL hosts with B10.S bone marrow (E) and reconstitution of B10.S hosts with

SJL bone marrow (F) led to essentially complete immunophenotypic conversion ( $98\% \pm 2\%$  and

$95\% \pm 1\%$  respectively). Homologous transplants were used as controls to rule out

reconstitution and manipulation artifacts (G, H). Dot plots are representative of at least 3

animals per condition in 2 separate experiments.

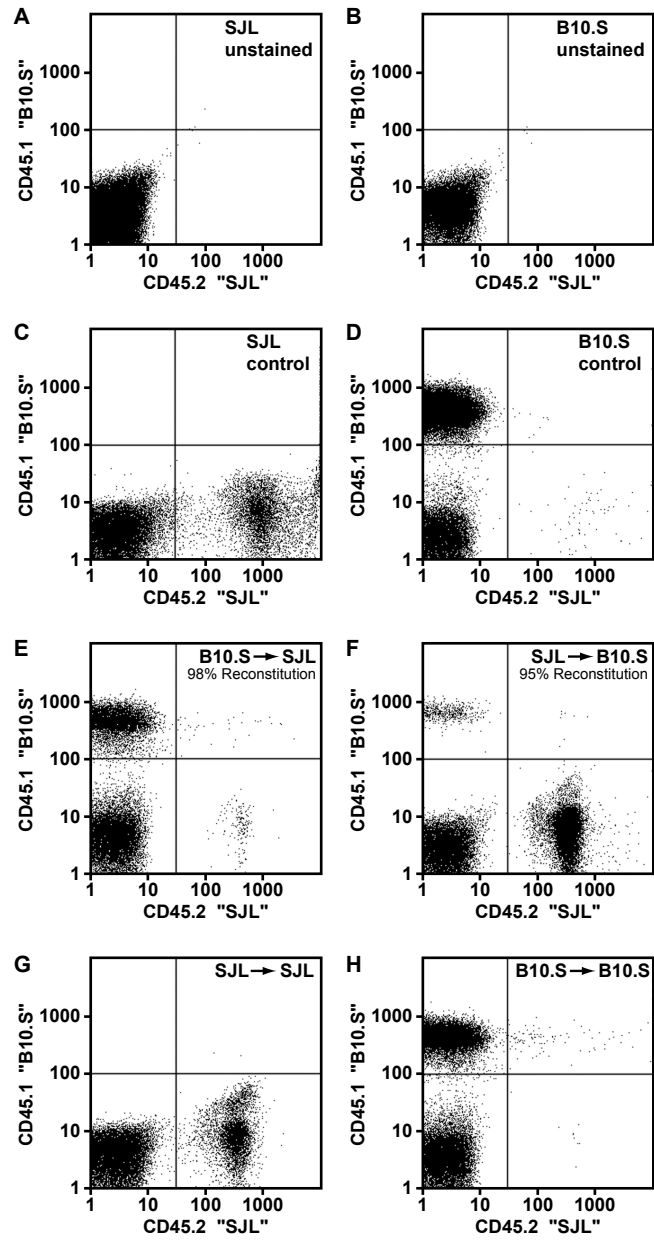

Supplement: srep00545-s1.pdf [file srep00545-s1.pdf]
